# Supplementary material for: Anisotropic photoresponse behavior of a LaAlO3 single-crystal-based vacuum-ultraviolet photodetector
Source: Royal Society of Chemistry journal article supplement (doi:10.1039/d2nr04552d), 2022-01-01
Supplement: d2nr04552d1.pdf [file d2nr04552d1.pdf]

## Supporting Information

### **Anisotropic Photoresponse Behavior in Single-crystal LaAlO<sub>3</sub>-based Vacuum-ultraviolet Photodetector**

Xiyu Sun,<sup>‡a,b</sup> Danhao Wang,<sup>‡a</sup> Muhammad Hunain Memon,<sup>‡a</sup> Siqi Zhu,<sup>‡c</sup> Huabin Yu,<sup>a</sup>  
Hongxuan Wang,<sup>b</sup> Shi Fang,<sup>a</sup> Yang Kang,<sup>a</sup> Xin Liu,<sup>a</sup> Yuanmin Luo,<sup>a</sup> Haochen Zhang,<sup>a</sup>  
Dongyang Luo,<sup>a</sup> and Haiding Sun<sup>\*a</sup>

<sup>a</sup>School of Microelectronics, University of Science and Technology of China, Hefei 230029, P. R. China E-mail: haiding@ustc.edu.cn

<sup>b</sup>Department of Materials Science and Engineering, Southern University of Science and Technology, Shenzhen 518055, P. R. China

<sup>c</sup>State Key Laboratory of Optoelectronic Materials and Technologies, School of Materials, Sun Yat-sen University, Guangzhou 510275, P. R. China

**S1. AFM images of LaAlO<sub>3</sub> three different crystal planes (100), (110), and (111) and their corresponding roughnesses (RMS).**

**Table S1.** Roughness measured at different wafer positions of the three wafers

| Crystal plane | Roughness of Area 1 | Roughness of Area 2 | Roughness of Area 3 | Roughness of Area 4 | Roughness of Area 5 | Average roughness |
|---------------|---------------------|---------------------|---------------------|---------------------|---------------------|-------------------|
| (100)         | 1.08 nm             | 1.05 nm             | 1.83 nm             | 1.02 nm             | 1.54 nm             | 1.30 nm           |
| (110)         | 1.15 nm             | 1.12 nm             | 1.09 nm             | 1.40 nm             | 0.49 nm             | 1.05 nm           |
| (111)         | 0.98 nm             | 1.31 nm             | 1.01 nm             | 1.30 nm             | 1.27 nm             | 1.17 nm           |

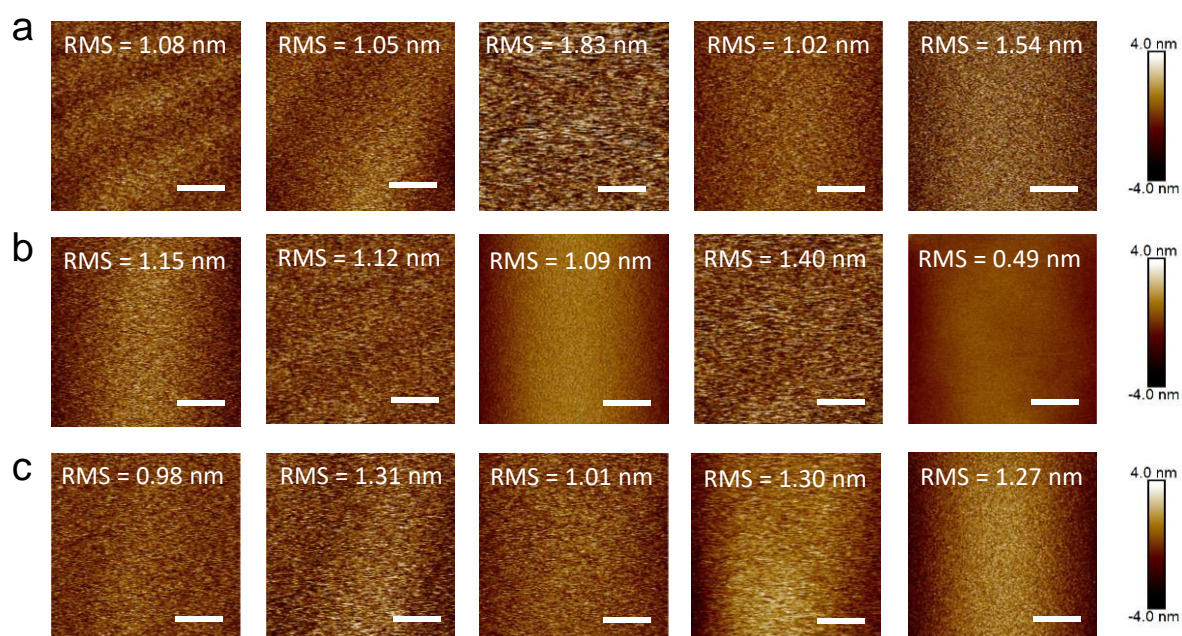

**Figure S1.** AFM images of three different crystal planes (a) (100), (b) (110), and (c) (111), each of them sampled five regions (scale bar, 500 nm).

## S2. Optical image and SEM image of the $\text{LaAlO}_3$ MSM PDs.

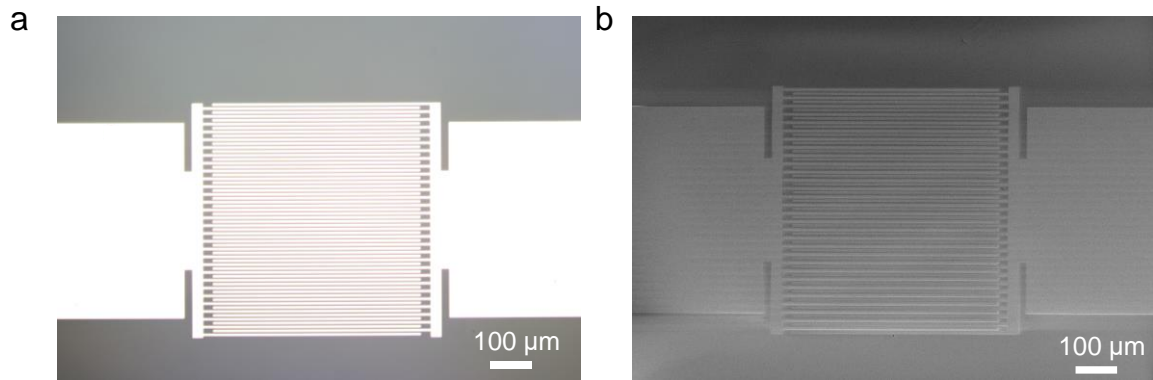

**Fig.S2** (a) Optical image and (b) SEM image of interdigitated-electrode with 5  $\mu\text{m}$  finger width on  $\text{LaAlO}_3$  single crystal.

**S3.  $I$ - $V$  measurements of the  $\text{LaAlO}_3$  MSM PDs with three different crystal planes (100), (110), and (111).**

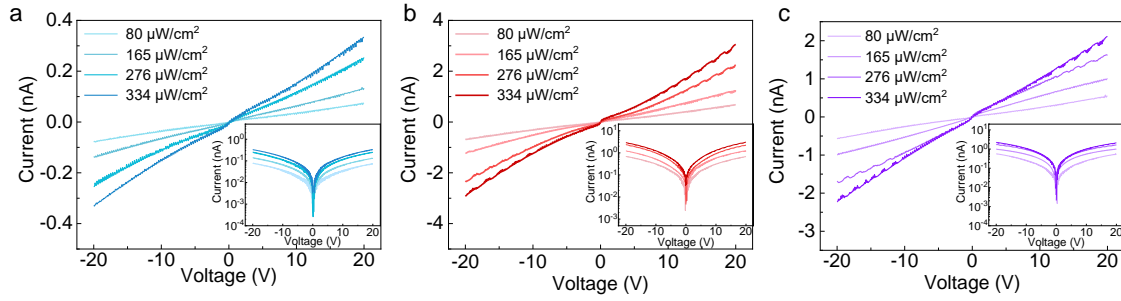

**Figure S3.**  $I$ - $V$  characteristics of the  $\text{LaAlO}_3$  MSM PDs with three different crystal planes (a) (100), (b) (110), and (c) (111) under 185 nm illumination with different intensities. The inset plots the  $I$ - $V$  curves in the log form.

**S4.  $I_{photo}$ - $t$  measurements of the  $\text{LaAlO}_3$  MSM PDs with three different crystal planes (100), (110), and (111).**

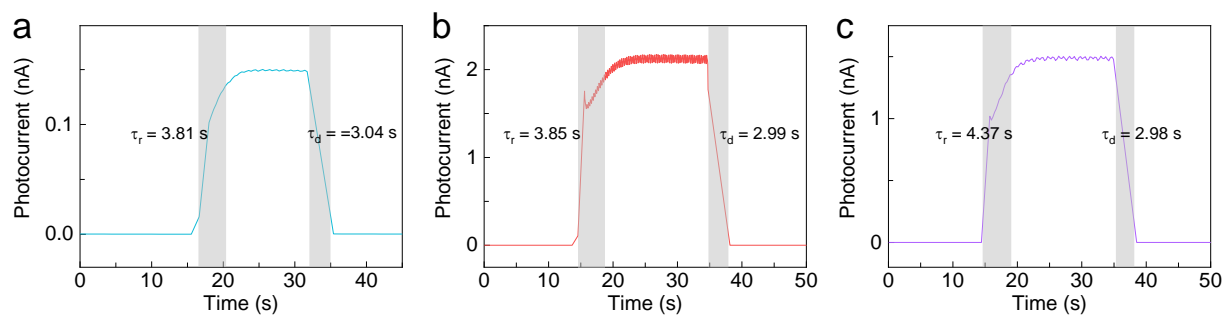

**Figure S4.**  $I_{photo}$ - $t$  characteristics of different crystal planes (a) (100), (b) (110), and (c) (111).
